# Supplementary material
Source: PubMed Central journal article supplement (PMC3769919)
Supplement: mmc1.pdf [file mmc1.pdf]

The American Journal of Human Genetics, Volume 93

## **Supplemental Data**

### **De Novo Mutations in *GNAO1*, Encoding a $G\alpha_o$ Subunit of Heterotrimeric G Proteins, Cause Epileptic Encephalopathy**

**Kazuyuki Nakamura, Hirofumi Kodera, Tenpei Akita, Masaaki Shiina, Mitsuhiro Kato, Hideki Hoshino, Hiroshi Terashima, Hitoshi Osaka, Shinichi Nakamura, Jun Tohyama, Tatsuro Kumada, Tomonori Furukawa, Satomi Iwata, Takashi Shiihara, Masaya Kubota, Satoko Miyatake, Eriko Koshimizu, Kiyomi Nishiyama, Mitsuko Nakashima, Yoshinori Tsurusaki, Noriko Miyake, Kiyoshi Hayasaka, Kazuhiro Ogata, Atsuo Fukuda, Naomichi Matsumoto, and Hiroto Saito**

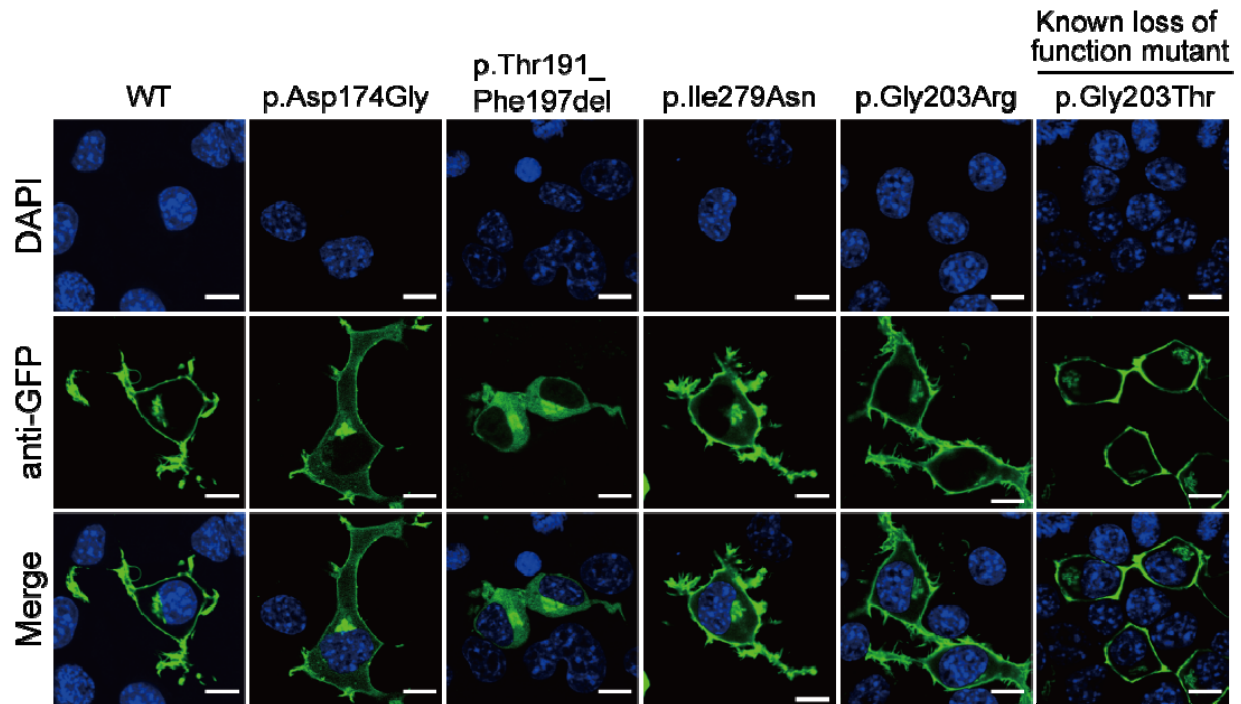

**Figure S1. Expression of AcGFP1-Tagged  $G\alpha_{o1}$  in N2A Cells**

Human *GNAO1* cDNA was inserted into pAcGFP1-N2 vector (Clontech, Mountain View, CA, U.S.A.) to generate C terminal AcGFP1-tagged  $G\alpha_{o1}$  expression constructs. Expression of AcGFP1-tagged wild-type  $G\alpha_{o1}$  (WT), p.Gly203Arg, and p.Gly203Thr mutants were observed at the cell periphery. In contrast, p.Thr191\_Phe197del was expressed in the cytosolic compartment. The p.Asp174Gly and p.Ile279Asn mutants were localized to the cell periphery with weak signal in the cytosol. The nucleus was stained with DAPI. The scale bars represent 10  $\mu$ m.

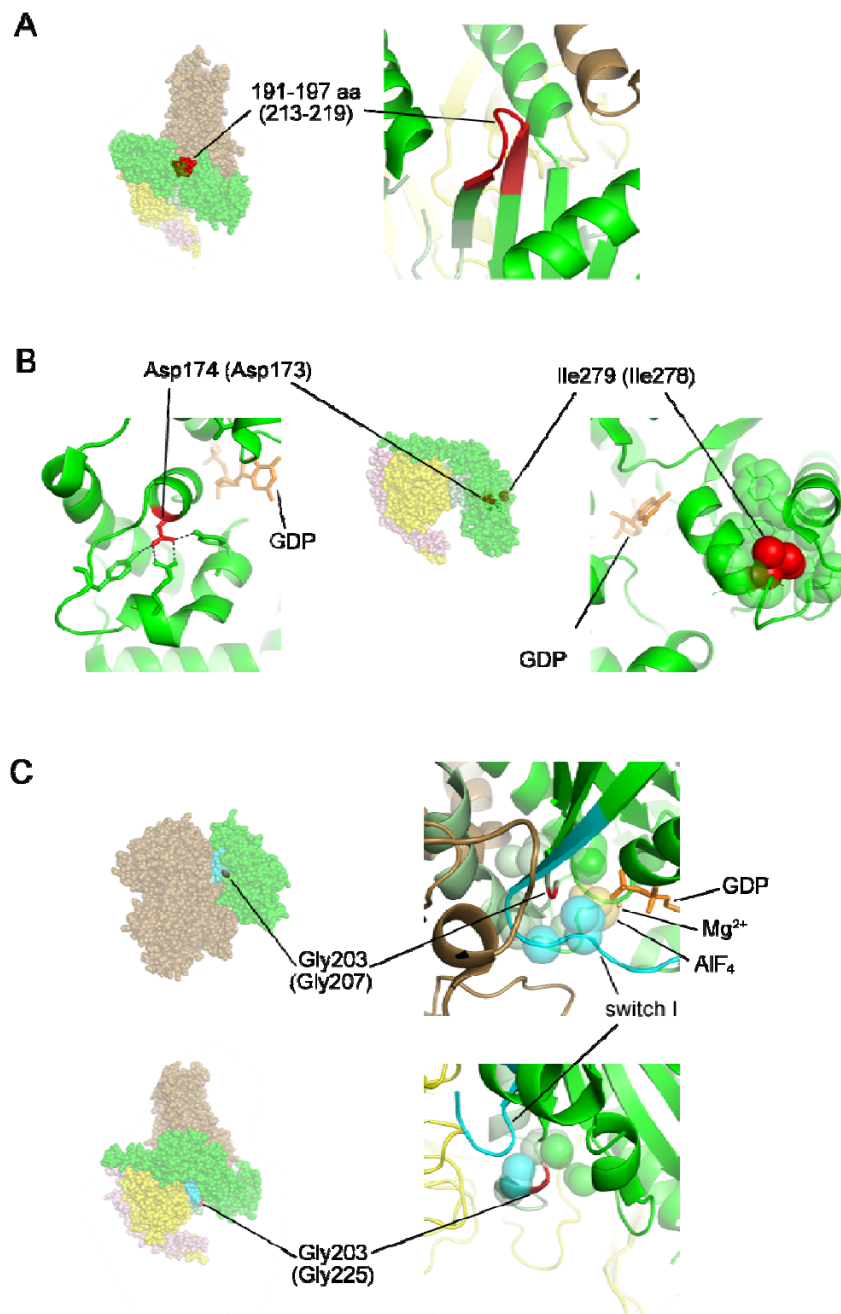

### Figure S2. Structural Consideration of the G $\alpha$ Mutations in Some G $\alpha$ -Containing Complexes

Overall and close-up views of the positions in the G $\alpha$  subunit-containing complexes corresponding to the mutation sites found in human *GNAO1*; p.191\_197del in the G $\alpha_s$  $\beta\gamma$ - $\beta$ 2AR complex (PDB code 3SN6) (A), p.Asp174Gly and p.Ile279Asn in the GDP-bound G $\alpha_i$  $\beta\gamma$  heterotrimer (PDB code 1GG2) (B), and p.Gly203Arg in the transition-state analogue of GTP (GDP+AlF<sub>4</sub><sup>-</sup>)-bound G $\alpha_q$ -PLC $\beta$  complex (PDB code 3OHM) (top) and the G $\alpha_s$  $\beta\gamma$ - $\beta$ 2AR complex (bottom) (C). Overall views are shown in the space-filling representation as in Figure 4. In the close-up views,  $\alpha$  helices,  $\beta$  strands

and loops are depicted as ribbons, arrows and threads, respectively. Colors are as in Figure 4 except for nucleotides in orange and the mutated residues in red. The amino acid numbering shown is for human *GNAO1* with bovine  $G\alpha_s$  (A and C), rat  $G\alpha_{i1}$  (B), and mouse  $G\alpha_q$  (C) in parentheses. In B, side chains of some residues involved in a hydrophobic core are shown in the space-filling representation, and hydrogen bonds are shown as black dotted lines. In C, the switch I region is colored cyan, and heavy atoms within 5 Å distance from the atom corresponding to the  $\alpha$  carbon of Gly203 in the human  $G\alpha_{o1}$  are shown in the space-filling representation.

**Table S1. Primers and PCR Conditions**

| Exon          | Forward primer (5'>3')   | Reverse primer (5'>3') | Product size (bp) | PCR conditions               |
|---------------|--------------------------|------------------------|-------------------|------------------------------|
| Ex1           | TTTGTTTCCAGCCAGGAGAGGATA | GATCCTGGGCACATGGTGGTG  | 386               | KOD FX with 2 step PCR 70-64 |
| Ex2           | CCCCTGTTCCCTTAAGCTG      | GAGGACCCAGAACCAACGTA   | 286               | KOD FX 64-56                 |
| Ex3           | GACCTGGCCACAGTCAG        | AGGCAGCCAGCACTATAAA    | 326               | HotStartTaq MM Kit 64-56     |
| Ex4           | CTTGGCTGGCAGAGGTCTT      | CATCACCAGTCCCTTCCACT   | 295               | HotStartTaq MM Kit 64-56     |
| Ex5           | ACAGTGTCCAGGCATTTGGT     | CCTTGGCAGAAACACAGACA   | 347               | HotStartTaq MM Kit 64-56     |
| Ex6           | CAGCGTGCTCACAGCTTAAT     | CTCAGAGGGCTGGCCTATC    | 280               | HotStartTaq MM Kit 64-56     |
| Ex7-variant 1 | CCAGTCCCTCTCTGTCAAGC     | GAGCAGCCTGTTCTCTGAGC   | 329               | KOD FX 64-56                 |
| Ex7-variant 2 | AGCCACATTGGTGGACCTT      | CATCCACAGAGCACAGGAAG   | 349               | HotStartTaq MM Kit 64-56     |
| Ex8-variant 1 | ATCCCACTTCTGGGACAC       | TCTGTGGGTGCTGGAATCAT   | 350               | HotStartTaq MM Kit 64-56     |
| Ex8-variant 2 | GTCCATGCCAAGCAGTCC       | CAAGTGCAAAGAGTGGTCTGA  | 348               | HotStartTaq MM Kit 64-56     |

The column “PCR conditions” shows the PCR enzymes used and the range of annealing temperatures. The temperature was lowered by 2°C every 3 cycles to the lowest annealing temperature. Then, the PCR reaction was cycled 30 times.

The details of the PCR conditions are as follows:

Hot Start Taq MM Kit: 95°C for 10 s, 64°C, 60°C, 58°C, 56°C for 30 s, and 72°C for 30 s

KOD-FX: 95°C for 10 s, 64°C, 60°C, 58°C, 56°C for 30 s, and 72°C for 30 s

KOD-FX with 2 step PCR: 98°C for 10 s and 70°C, 68°C, 66°C, 64°C for 30 s

The following PCR amplification enzymes were used: Hot Start Taq MM Kit, Hot Start Taq Master Mix Kit (Qiagen, Tokyo, Japan); KOD FX, KOD FX Neo (Toyobo, Osaka, Japan)

**Table S2. Prediction of the Pathogenicity of the *GNAO1* Mutations**

| Case | Diagnosis                | cDNA change  | Amino acid change  | Inheritance              | SIFT | Polyphen2                  | Mutation Taster          | In-house database |
|------|--------------------------|--------------|--------------------|--------------------------|------|----------------------------|--------------------------|-------------------|
| 1    | Ohtahara syndrome        | c.836T>A     | p.Ile279Asn        | <i>de novo</i>           | 0.00 | Probably damaging<br>1.000 | Disease causing<br>0.999 | 0 / 408           |
| 2    | Ohtahara syndrome        | c.521A>G     | p.Asp174GLy        | <i>de novo</i><br>mosaic | 0.00 | Probably damaging<br>1.000 | Disease causing<br>0.999 | 0 / 408           |
| 3    | Ohtahara syndrome        | c.572_592del | p.Thr191_Phe197del | <i>de novo</i>           | N/A  | N/A                        | N/A                      | 0 / 408           |
| 4    | Epileptic encephalopathy | c.607G>A     | p.GLy203Arg        | <i>de novo</i>           | 0.00 | Probably damaging<br>1.000 | Disease causing<br>0.999 | 0 / 408           |

N/A = not applicable.

SIFT (<http://sift.jcvi.org/>): scores of less than 0.05% indicate substitutions that are predicted as intolerant.

PolyPhen-2 (<http://genetics.bwh.harvard.edu/pph2/>): scores are evaluated as 0.000 (most probably benign) to 0.999 (most probably damaging).

Mutation Taster (<http://www.mutationtaster.org/>): rapid evaluation of DNA sequence alterations. The alterations are classified as disease causing or polymorphism.

**Table S3. Read Counts in Family of Individual 2 with a Mosaic Mutation in *GNAO1* (c.521A>G)**

| Methods<br>& samples   | Read counts    |                   | % of Mutant alleles |
|------------------------|----------------|-------------------|---------------------|
|                        | Mutant alleles | Wild type alleles |                     |
| <b>Whole exome</b>     |                |                   |                     |
| Blood #1               | 6              | 29                | 17.14               |
| <b>Deep sequencing</b> |                |                   |                     |
| Blood #1               | 2,996          | 13,430            | 18.24               |
| Blood #2               | 2,659          | 11,784            | 18.41               |
| Nail #1                | 4,187          | 12,174            | 25.59               |
| Nail #2                | 2,975          | 14,948            | 16.60               |
| Saliva                 | 3,073          | 14,255            | 17.73               |
| Father Blood           | 23*            | 18,154            | 0.13                |
| Mother Blood           | 27*            | 14,872            | 0.18                |

Samples of blood and nail have been independently obtained twice (#1 and #2).

\*These small numbers of mutant reads were considered to be PCR or sequencing errors.
